# Supplementary material for: Integrating electronic health records and GWAS summary statistics to predict the progression of autoimmune diseases from preclinical stages
Source: PubMed Central journal article supplement — Nat Commun. 2025 Jan 2;16:180. doi: 10.1038/s41467-024-55636-6 (PMC11695684; doi:10.1038/s41467-024-55636-6), 2025-01-02
Supplement: 41467_2024_55636_MOESM4_ESM.pdf [file 41467_2024_55636_MOESM4_ESM.pdf]

## Reporting Summary

Nature Portfolio wishes to improve the reproducibility of the work that we publish. This form provides structure for consistency and transparency in reporting. For further information on Nature Portfolio policies, see our [Editorial Policies](#) and the [Editorial Policy Checklist](#).

### Statistics

For all statistical analyses, confirm that the following items are present in the figure legend, table legend, main text, or Methods section.

n/a Confirmed

- The exact sample size ( $n$ ) for each experimental group/condition, given as a discrete number and unit of measurement
- A statement on whether measurements were taken from distinct samples or whether the same sample was measured repeatedly
- The statistical test(s) used AND whether they are one- or two-sided  
*Only common tests should be described solely by name; describe more complex techniques in the Methods section.*
- A description of all covariates tested
- A description of any assumptions or corrections, such as tests of normality and adjustment for multiple comparisons
- A full description of the statistical parameters including central tendency (e.g. means) or other basic estimates (e.g. regression coefficient) AND variation (e.g. standard deviation) or associated estimates of uncertainty (e.g. confidence intervals)
- For null hypothesis testing, the test statistic (e.g.  $F$ ,  $t$ ,  $r$ ) with confidence intervals, effect sizes, degrees of freedom and  $P$  value noted  
*Give  $P$  values as exact values whenever suitable.*
- For Bayesian analysis, information on the choice of priors and Markov chain Monte Carlo settings
- For hierarchical and complex designs, identification of the appropriate level for tests and full reporting of outcomes
- Estimates of effect sizes (e.g. Cohen's  $d$ , Pearson's  $r$ ), indicating how they were calculated

*Our web collection on [statistics for biologists](#) contains articles on many of the points above.*

### Software and code

Policy information about [availability of computer code](#)

Data collection

Data analysis

We developed GPS software: <https://github.com/wangc29/gps>  
 We used the following other softwares for data-analysis,  
 Lassosum (0.4.5): <https://github.com/tshmak/lassosum>  
 bigsnpr (1.12.2): <https://github.com/privefl/bigsnpr>  
 PRS-CS (1.1.0): <https://github.com/getian107/PRScs>  
 MTAG (2017-04-07): <https://github.com/JonJala/mtag>  
 TL-PRS (1.0.0): <https://github.com/ZhangchenZhao/TLPRS>  
 multivariate Lassosum (version 1.0.0): <https://github.com/abureau/multivariateLassosum>  
 ADMIXTURE (1.3.0): <https://dalexander.github.io/admixture/download.html>  
 PLINK (2.0): <https://www.cog-genomics.org/plink/2.0/>  
 REGENIE (2.2.4): <https://rgcgithub.github.io/regenie/>  
 PheWAS (2023-5-31): <https://github.com/PheWAS/PheWAS>  
 We also used the following R packages:  
 psychometric version 2.3, ROCR version 1.0-11, MASS version 7.3-51.4, data.table version 1.14.0, ggplot version 3.3.5

For manuscripts utilizing custom algorithms or software that are central to the research but not yet described in published literature, software must be made available to editors and reviewers. We strongly encourage code deposition in a community repository (e.g. GitHub). See the Nature Portfolio [guidelines for submitting code & software](#) for further information.

## Data

Policy information about [availability of data](#)

All manuscripts must include a [data availability statement](#). This statement should provide the following information, where applicable:

- Accession codes, unique identifiers, or web links for publicly available datasets
- A description of any restrictions on data availability
- For clinical datasets or third party data, please ensure that the statement adheres to our [policy](#)

1. GWAS summary statistics for autoimmune diseases are from the following publications (PubMed ID): 26502338,28714469,18204446,18204098,34594039,29848360,34594039,33310728
2. The EHR lab test, diagnosis and genotype data of patients from the All of Us (<https://www.researchallofus.org>) biobank can be accessed by approved researchers for the All of Us study.
3. The EHR lab test, diagnosis and genotype data of patients from the Vanderbilt biobank (<https://vict.vumc.org/biovu-description/>) can be accessed via Vanderbilt University.

## Research involving human participants, their data, or biological material

Policy information about studies with [human participants or human data](#). See also policy information about [sex, gender \(identity/presentation\), and sexual orientation](#) and [race, ethnicity and racism](#).

|                                                                    |                                                                                                                                                                                                                                             |
|--------------------------------------------------------------------|---------------------------------------------------------------------------------------------------------------------------------------------------------------------------------------------------------------------------------------------|
| Reporting on sex and gender                                        | Sex is used as a covariate when conducting GWAS analysis.                                                                                                                                                                                   |
| Reporting on race, ethnicity, or other socially relevant groupings | Ancestries for participants from the Vanderbilt biobank are determined by ADMIXTURE software using their genotype data. Ancestries for participants from the All of US biobank are determined by utilizing pre-calculated genetic ancestry. |
| Population characteristics                                         | NA                                                                                                                                                                                                                                          |
| Recruitment                                                        | NA                                                                                                                                                                                                                                          |
| Ethics oversight                                                   | NA                                                                                                                                                                                                                                          |

Note that full information on the approval of the study protocol must also be provided in the manuscript.

## Field-specific reporting

Please select the one below that is the best fit for your research. If you are not sure, read the appropriate sections before making your selection.

- Life sciences       Behavioural & social sciences       Ecological, evolutionary & environmental sciences

For a reference copy of the document with all sections, see [nature.com/documents/nr-reporting-summary-flat.pdf](https://www.nature.com/documents/nr-reporting-summary-flat.pdf)

## Life sciences study design

All studies must disclose on these points even when the disclosure is negative.

|                 |                                                                                                                                                                                                                                                                                                                                                                                                                                                                                                                                                                                                                                                                                                                                                                                                                                                                                                                                                                                                                                                                                                                                                                            |
|-----------------|----------------------------------------------------------------------------------------------------------------------------------------------------------------------------------------------------------------------------------------------------------------------------------------------------------------------------------------------------------------------------------------------------------------------------------------------------------------------------------------------------------------------------------------------------------------------------------------------------------------------------------------------------------------------------------------------------------------------------------------------------------------------------------------------------------------------------------------------------------------------------------------------------------------------------------------------------------------------------------------------------------------------------------------------------------------------------------------------------------------------------------------------------------------------------|
| Sample size     | <p>No sample size calculation was performed. The study uses all existing datasets we can access.</p> <ol style="list-style-type: none"> <li>1. Summary statistics of GWAS studies of autoimmune diseases are retrieved from previous publications. The resulting sample size is 37,828 for Rheumatoid Arthritis (RA) and 16,654 for Systemic Lupus Erythematosus (SLE).</li> <li>2. The sample size for patients with preclinical and full-blown RA and SLE are calculated based on extracted data from the Vanderbilt biobank and the All of Us biobank,</li> </ol> <p>European samples:<br/> Vanderbilt Biobank: preclinical RA, 414; full-blown RA 329<br/> Vanderbilt Biobank: preclinical SLE, 2784; full-blown RA 394<br/> All of Us Biobank: preclinical RA, 397, full-blown RA 126<br/> All of Us Biobank: preclinical SLE, 2150; full-blown RA 184</p> <p>Non European samples:<br/> All of US Biobank's African ancestry samples: preclinical RA, 283, full-blown RA 72<br/> All of US Biobank's African ancestry samples: preclinical SLE 735 full-blown SLE 159<br/> All of US Biobank's American ancestry samples: preclinical SLE 734 full-blown SLE 150</p> |
| Data exclusions | <p>Patients from non-European ancestry groups in Vanderbilt Biobank are excluded due to their limited sample size for constructing polygenic risk scores.</p> <p>Patients from non-European ancestry groups with sample size less than 100 in All of US Biobank are excluded due to limited sample size for model evaluation.</p>                                                                                                                                                                                                                                                                                                                                                                                                                                                                                                                                                                                                                                                                                                                                                                                                                                          |
| Replication     | We trained our model using data from the Vanderbilt biobank and further tested the trained model using the All of US biobank.                                                                                                                                                                                                                                                                                                                                                                                                                                                                                                                                                                                                                                                                                                                                                                                                                                                                                                                                                                                                                                              |

Randomization

Blinding

## Reporting for specific materials, systems and methods

We require information from authors about some types of materials, experimental systems and methods used in many studies. Here, indicate whether each material, system or method listed is relevant to your study. If you are not sure if a list item applies to your research, read the appropriate section before selecting a response.

### Materials & experimental systems

### Methods

- | n/a                                 | Included in the study                                  |
|-------------------------------------|--------------------------------------------------------|
| <input checked="" type="checkbox"/> | <input type="checkbox"/> Antibodies                    |
| <input checked="" type="checkbox"/> | <input type="checkbox"/> Eukaryotic cell lines         |
| <input checked="" type="checkbox"/> | <input type="checkbox"/> Palaeontology and archaeology |
| <input checked="" type="checkbox"/> | <input type="checkbox"/> Animals and other organisms   |
| <input checked="" type="checkbox"/> | <input type="checkbox"/> Clinical data                 |
| <input checked="" type="checkbox"/> | <input type="checkbox"/> Dual use research of concern  |
| <input checked="" type="checkbox"/> | <input type="checkbox"/> Plants                        |

- | n/a                                 | Included in the study                           |
|-------------------------------------|-------------------------------------------------|
| <input checked="" type="checkbox"/> | <input type="checkbox"/> ChIP-seq               |
| <input checked="" type="checkbox"/> | <input type="checkbox"/> Flow cytometry         |
| <input checked="" type="checkbox"/> | <input type="checkbox"/> MRI-based neuroimaging |

## Plants

Seed stocks

Novel plant genotypes

Authentication
